# Supplementary material
Source: PubMed Central journal article supplement (PMC3457241)
Supplement: JB.00881-12_zjb999091969so1.pdf [file JB.00881-12_zjb999091969so1.pdf]

## Supplementary Material

### Function and regulation of isoforms of carbon monoxide dehydrogenase/acetyl-CoA synthase in *Methanosarcina acetivorans*

Nicole Matschiavelli, Ellen Oelgeschläger, Berardino Cocchiara, Johannes Finke, and Michael Rother

Supplementary Table S1: Primers used in this study.

| Primer        | Sequence <sup>a</sup>                                  | Restriction site(s) introduced |
|---------------|--------------------------------------------------------|--------------------------------|
| 5-up1016      | CCGAAGCTCGAGGGCGCGCCGCAAATTA<br>CTA CAGGGAATTTTCTATAG  | XhoI, AscI                     |
| 3-up1016      | GAACCCAAGCTTGAAATTACACACTTACA<br>AACAA AATTAAGTAC      | HindIII                        |
| 5-do1011      | CGGGATCCCTCAATTTTCGACTACAGCAA<br>AAAT C                | BamHI                          |
| 3-do1011      | GACTAGTGGCGCGCCGCTGTTTTAAGTTCT<br>CCA TCAAACCTTC       | SpeI, AscI                     |
| 5-up3860      | CCGAAGCTCGAGGGCGCGCCCGAAGTTCT<br>TAT GTTTGGAAACTTTTTTC | XhoI, AscI                     |
| 3-up3860      | GAACCCAAGCTTCGCCTTAAAGTTACAACCG<br>TTT AAATG           | HindIII                        |
| 5-do3865      | CGGGATCCCGCAGGTAATTCTTTAAGGATT<br>CAC                  | BamHI                          |
| 3-do3865      | GACTAGTGGCGCGCCAGCAGAATGAACACGG<br>AAACAG              | SpeI, AscI                     |
| 5-up4399      | CCGAAGCTCGAGGGCGCGCCGCCTTAGACCT<br>G AGTTCAAGTC        | XhoI, AscI                     |
| 3-up4399      | GAACCCAAGCTTACGCAGTTGAAGGTAAAA<br>ATC                  | HindIII                        |
| 5-do4399      | CGGGATCCGGTTCAATGCTCGGTTCAATGC                         | BamHI                          |
| 3-do4399      | GACTAGTGGCGCGCCCTGGATAAACCAGGAT<br>AT GACTTC           | SpeI, AscI                     |
| ocdhA-SB/forw | GTAGGGGCAGCAAAGGAG                                     |                                |
| ocdhA-SB/rev  | CGTGGTCAAGGCTGCCG                                      |                                |

a: 5' → 3'; restriction site(s) introduced are underlined.

Supplementary Table S2: Substrate-dependent growth parameters of *cdh*-mutants.

| Strain | Growth substrate <sup>a</sup> |                         |                   |                         |                   |                         |
|--------|-------------------------------|-------------------------|-------------------|-------------------------|-------------------|-------------------------|
|        | Methanol                      |                         | CO                |                         | Acetate           |                         |
|        | $t_d$                         | final OD <sub>578</sub> | $t_d$             | final OD <sub>578</sub> | $t_d$             | final OD <sub>578</sub> |
| WWM1   | 9.2 ± 0.8                     | 1.2 ± 0.1               | 26.6 ± 2.6        | 0.6 ± 0.04              | 46.8 ± 1.7        | 0.7 ± 0.02              |
| MCD1   | 8.8 ± 0.6                     | 1.2 ± 0.3               | 29.3 ± 2.1        | 0.6 ± 0.03              | 48.4 ± 2.1        | 0.7 ± 0.01              |
| MCD2   | 9.8 ± 0.8                     | 1.2 ± 0.1               | 35.5 ± 3.4        | 0.6 ± 0.1               | 46.6 ± 4.3        | 0.7 ± 0.03              |
| MCD3   | 8.9 ± 1.2                     | 1.1 ± 0.1               | 23.5 ± 1.5        | 0.9 ± 0.01              | 44.4 ± 4.5        | 0.7 ± 0.01              |
| MCD31  | 10.4 ± 0.4                    | 1.3 ± 0.2               | 23.6 ± 2.2        | 0.7 ± 0.02              | 47.8 ± 3.6        | 0.5 ± 0.02              |
| MCD32  | 10.2 ± 0.6                    | 1.3 ± 0.2               | 25.5 ± 1.3        | 0.7 ± 0.02              | 48.0 ± 3.0        | 0.7 ± 0.02              |
| MCD21  | 23.2 ± 0.4                    | 1.2 ± 0.1               | n.d. <sup>b</sup> | n.d. <sup>b</sup>       | n.d. <sup>b</sup> | n.d. <sup>b</sup>       |
| MCD213 | 23.1 ± 0.3                    | 1.1 ± 0.02              | n.d. <sup>b</sup> | n.d. <sup>b</sup>       | n.d. <sup>b</sup> | n.d. <sup>b</sup>       |

a: *M. acetivorans* was cultivated on methanol (125 mM), CO (150 kPa) or acetate (120 mM); doubling time ( $t_d$ ) in h and final optical density were determined photometrically at 578 nm (OD<sub>578</sub>). Shown are average values from at least three independent cultures, ± indicates standard deviation; the experiments were qualitatively reproduced at least once.

b: n.d.: not detectable as strains cannot grow on the respective substrate.

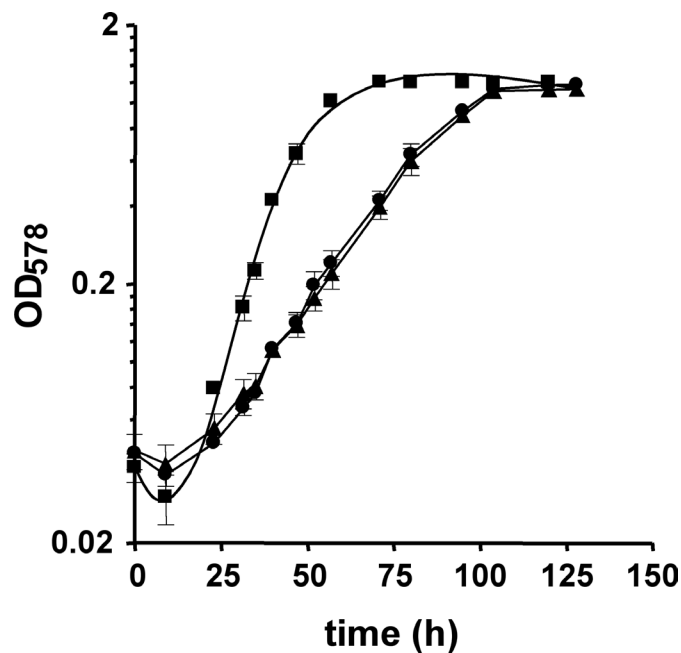

Supplementary Figure S1: Substrate-dependent growth of *M. acetivorans cdh* null mutants. Growth of the *cdh* wild type WWM1 (squares), of the  $\Delta cdh1 \Delta cdh2$  double mutant MCD21 (circles) and of the  $\Delta cdh1 \Delta cdh2 \Delta cdhA3$  triple mutant MCD213 (triangles) in the presence of 125 mM methanol and 40 mM acetate was monitored by measuring the optical density at 578 nm (OD<sub>578</sub>). Shown are average values and standard deviations of three independent cultures for each strain; the experiment was qualitatively reproduced at least twice.

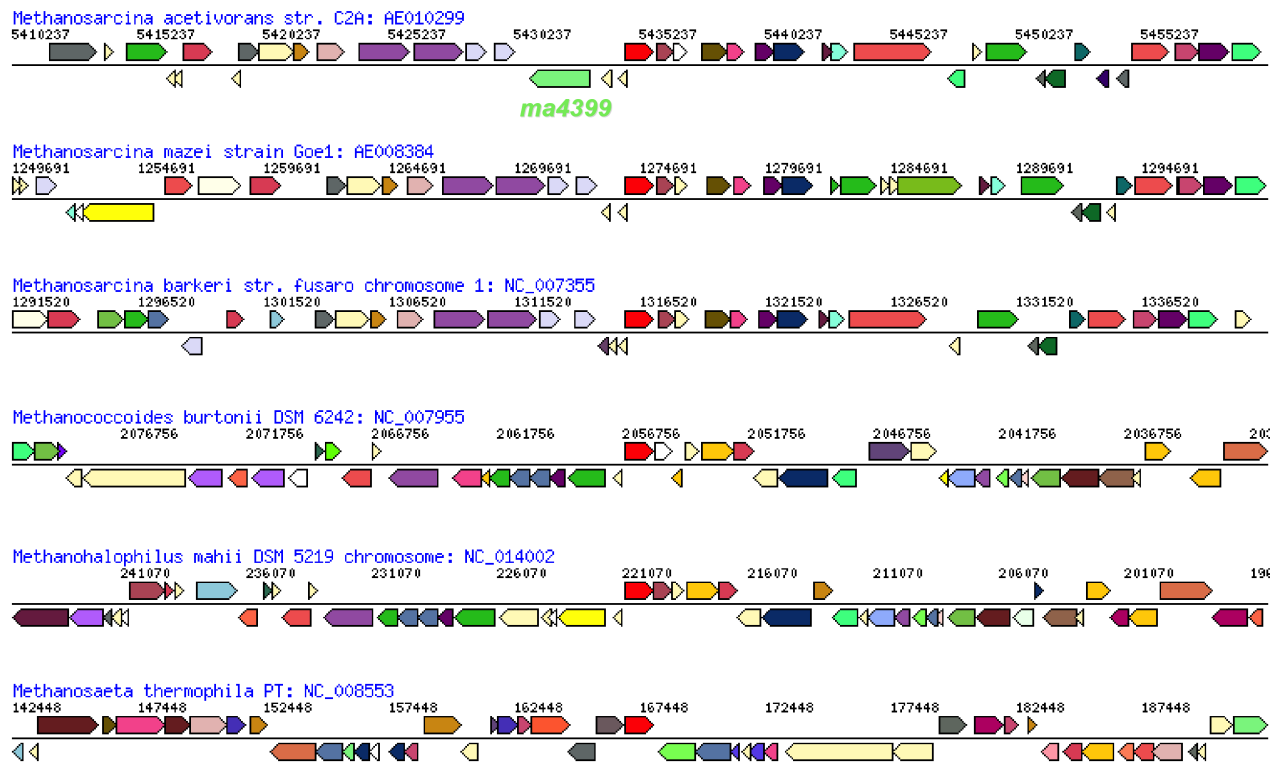

Supplementary Figure S2: Comparison of local gene synteny in methanogenic archaea. The genomic environment of *cdhA3* (*ma4399*, light green) from *M. acetivorans* (top) was compared to the respective genomic regions in *M. mazei* (second from top) and *M. barkeri* (third from top) using the *Display Conserved Neighborhood* function of the Integrated Microbial Genomes database at the DOE Joint Genome Institute (<http://img.jgi.doe.gov>); as the latter two do not encode stand-alone *cdhA* subunits *ma4401* was used as the query, which also allowed to include *Methanococcoides burtonii* (third from bottom), *Methanohalophilus mahii* (second from bottom) and *Methanosaeta thermophila* (bottom) in the comparison; orthologous genes are colored identically; numbers depict position in the respective genome sequence.
